# Supplementary material for: Interindividual Brain and Behavior Differences in Adaptation to Unexpected Uncertainty
Source: MDPI journal article supplement (doi:10.3390/biology12101323), 2023-10-10
Supplement: s1 [file s1]

Table S1. Correlation matrix of behavioral and psychological variables

|            |                | Exploi | Cost   | Confidence | TMT_B-A | FMPS_PE | FMPS_DA | FMPS_O | FMPS_SP | SPSRQ_P | SPSRQ_R | STAI_E | STAI_T | SSEI   | HAD_D | HAD_A  |     |        |   |       |   |
|------------|----------------|--------|--------|------------|---------|---------|---------|--------|---------|---------|---------|--------|--------|--------|-------|--------|-----|--------|---|-------|---|
| Exploi     | Spearman's rho | —      |        |            |         |         |         |        |         |         |         |        |        |        |       |        |     |        |   |       |   |
|            | valeur p       | —      |        |            |         |         |         |        |         |         |         |        |        |        |       |        |     |        |   |       |   |
| Cost       | Spearman's rho | -0.863 | ***    | —          |         |         |         |        |         |         |         |        |        |        |       |        |     |        |   |       |   |
|            | valeur p       | < .001 | —      |            |         |         |         |        |         |         |         |        |        |        |       |        |     |        |   |       |   |
| Confidence | Spearman's rho | -0.160 | 0.217  | —          |         |         |         |        |         |         |         |        |        |        |       |        |     |        |   |       |   |
|            | valeur p       | 0.415  | 0.267  | —          |         |         |         |        |         |         |         |        |        |        |       |        |     |        |   |       |   |
| TMT_B-A    | Spearman's rho | -0.224 | 0.252  | -0.207     | —       |         |         |        |         |         |         |        |        |        |       |        |     |        |   |       |   |
|            | valeur p       | 0.292  | 0.234  | 0.332      | —       |         |         |        |         |         |         |        |        |        |       |        |     |        |   |       |   |
| FMPS_PE    | Spearman's rho | 0.128  | -0.101 | 0.030      | -0.191  | —       |         |        |         |         |         |        |        |        |       |        |     |        |   |       |   |
|            | valeur p       | 0.543  | 0.631  | 0.888      | 0.382   | —       |         |        |         |         |         |        |        |        |       |        |     |        |   |       |   |
| FMPS_DA    | Spearman's rho | 0.125  | -0.124 | -0.029     | 0.061   | 0.562   | **      | —      |         |         |         |        |        |        |       |        |     |        |   |       |   |
|            | valeur p       | 0.551  | 0.555  | 0.889      | 0.784   | 0.003   | —       |        |         |         |         |        |        |        |       |        |     |        |   |       |   |
| FMPS_O     | Spearman's rho | 0.127  | -0.150 | -0.305     | 0.285   | -0.225  | 0.195   | —      |         |         |         |        |        |        |       |        |     |        |   |       |   |
|            | valeur p       | 0.547  | 0.474  | 0.139      | 0.188   | 0.280   | 0.349   | —      |         |         |         |        |        |        |       |        |     |        |   |       |   |
| FMPS_SP    | Spearman's rho | -0.047 | 0.112  | 0.228      | -0.259  | 0.607   | **      | 0.473  | *       | -0.035  | —       |        |        |        |       |        |     |        |   |       |   |
|            | valeur p       | 0.822  | 0.593  | 0.274      | 0.232   | 0.001   | 0.017   | 0.869  | —       |         |         |        |        |        |       |        |     |        |   |       |   |
| SPSRQ_P    | Spearman's rho | 0.248  | -0.117 | 0.026      | -0.057  | 0.535   | **      | 0.596  | **      | 0.177   | 0.353   | —      |        |        |       |        |     |        |   |       |   |
|            | valeur p       | 0.202  | 0.552  | 0.894      | 0.791   | 0.006   | 0.002   | 0.397  | 0.083   | —       |         |        |        |        |       |        |     |        |   |       |   |
| SPSRQ_R    | Spearman's rho | -0.156 | 0.110  | 0.591      | ***     | -0.108  | 0.268   | 0.229  | -0.119  | 0.327   | -0.014  | —      |        |        |       |        |     |        |   |       |   |
|            | valeur p       | 0.429  | 0.576  | <.001      | 0.616   | 0.196   | 0.271   | 0.572  | 0.111   | 0.945   | —       |        |        |        |       |        |     |        |   |       |   |
| STAI_E     | Spearman's rho | 0.284  | -0.116 | 0.041      | 0.210   | 0.335   | 0.193   | -0.075 | 0.108   | 0.648   | ***     | -0.136 | —      |        |       |        |     |        |   |       |   |
|            | valeur p       | 0.143  | 0.556  | 0.835      | 0.326   | 0.101   | 0.355   | 0.722  | 0.608   | < .001  | 0.490   | —      |        |        |       |        |     |        |   |       |   |
| STAI_T     | Spearman's rho | 0.293  | -0.204 | 0.051      | -0.129  | 0.742   | ***     | 0.496  | *       | -0.093  | 0.460   | *      | 0.765  | ***    | 0.060 | 0.656  | *** | —      |   |       |   |
|            | valeur p       | 0.131  | 0.298  | 0.797      | 0.549   | < .001  | 0.012   | 0.659  | 0.021   | < .001  | 0.761   | < .001 | —      |        |       |        |     |        |   |       |   |
| SSEI       | Spearman's rho | -0.276 | 0.132  | -0.131     | -0.023  | -0.364  | -0.637  | **     | -0.215  | -0.170  | -0.835  | ***    | 0.010  | -0.561 | **    | -0.684 | *** | —      |   |       |   |
|            | valeur p       | 0.182  | 0.529  | 0.533      | 0.918   | 0.087   | 0.001   | 0.325  | 0.438   | < .001  | 0.961   | 0.004  | < .001 | —      |       |        |     |        |   |       |   |
| HAD_D      | Spearman's rho | 0.265  | -0.220 | 0.065      | 0.139   | 0.468   | *       | 0.334  | 0.064   | 0.326   | 0.412   | -0.020 | 0.359  | 0.487  | *     | -0.302 | —   |        |   |       |   |
|            | valeur p       | 0.222  | 0.313  | 0.767      | 0.547   | 0.032   | 0.140   | 0.782  | 0.149   | 0.051   | 0.927   | 0.093  | 0.019  | 0.173  | —     |        |     |        |   |       |   |
| HAD_A      | Spearman's rho | 0.210  | -0.237 | -0.355     | -0.132  | 0.567   | **      | 0.368  | 0.124   | 0.188   | 0.589   | **     | -0.102 | 0.460  | *     | 0.685  | *** | -0.439 | * | 0.304 | — |
|            | valeur p       | 0.336  | 0.277  | 0.097      | 0.569   | 0.007   | 0.101   | 0.593  | 0.415   | 0.003   | 0.642   | 0.027  | < .001 | 0.041  | 0.158 | —      |     |        |   |       |   |

\*Legend : \* p < .05, \*\* p < .01, \*\*\* p < .001

**Confidence** : confidence in learning (%); **TMT**: Trail Making Test; **FMPS**: Frost Multidimensional Perfectionism Scale (CM: “Concern over Mistakes”, DA: “Doubts about Actions”, O: “Organization”, PS: “Personal Standards”); **SPSRQ**: Sensitivity to Punishment and Sensitivity to Reward Questionnaire (P: “Sensitivity to Punishment”, R: “Sensitivity to Reward”); **SSEI**: Social Self-Esteem Inventory; **STAI**: State-Trait Anxiety Inventory (S: “State”, T: “Trait”); **HAD**: Hospital Anxiety and Depression scale (A: “Anxiety” and D: “Depres-sion”).

Table S2. Correlation matrix of changes of rFC and psychological variables

|             |                | front_front | cere_cinguR | cere_cinguL | cere_tempo | cere_front | cauda_lingu | Confidence | TMT B-A | FMPS_PE   | FMPS_DA   | FMPS_O | FMPS_SP | SPSRQ_P    | SPSRQ_R | STAI_E    | STAI_T     | SSEI     | HAD_D | HAD_A |
|-------------|----------------|-------------|-------------|-------------|------------|------------|-------------|------------|---------|-----------|-----------|--------|---------|------------|---------|-----------|------------|----------|-------|-------|
| front_front | Spearman's rho | —           |             |             |            |            |             |            |         |           |           |        |         |            |         |           |            |          |       |       |
|             | p-value        | —           |             |             |            |            |             |            |         |           |           |        |         |            |         |           |            |          |       |       |
| cere_cinguR | Spearman's rho | 0.108       | —           |             |            |            |             |            |         |           |           |        |         |            |         |           |            |          |       |       |
|             | p-value        | 0.585       | —           |             |            |            |             |            |         |           |           |        |         |            |         |           |            |          |       |       |
| cere_cinguL | Spearman's rho | 0.236       | 0.755 ***   | —           |            |            |             |            |         |           |           |        |         |            |         |           |            |          |       |       |
|             | p-value        | 0.226       | < .001      | —           |            |            |             |            |         |           |           |        |         |            |         |           |            |          |       |       |
| cere_tempo  | Spearman's rho | 0.327       | 0.326       | 0.384 *     | —          |            |             |            |         |           |           |        |         |            |         |           |            |          |       |       |
|             | p-value        | 0.090       | 0.090       | 0.044       | —          |            |             |            |         |           |           |        |         |            |         |           |            |          |       |       |
| cere_front  | Spearman's rho | 0.278       | 0.180       | 0.294       | 0.641 ***  | —          |             |            |         |           |           |        |         |            |         |           |            |          |       |       |
|             | p-value        | 0.152       | 0.359       | 0.129       | < .001     | —          |             |            |         |           |           |        |         |            |         |           |            |          |       |       |
| cauda_lingu | Spearman's rho | 0.072       | 0.180       | -0.005      | -0.459 *   | -0.406 *   | —           |            |         |           |           |        |         |            |         |           |            |          |       |       |
|             | p-value        | 0.715       | 0.359       | 0.978       | 0.014      | 0.032      | —           |            |         |           |           |        |         |            |         |           |            |          |       |       |
| Confidence  | Spearman's rho | -0.322      | 0.085       | -0.024      | -0.008     | 0.032      | -0.024      | —          |         |           |           |        |         |            |         |           |            |          |       |       |
|             | p-value        | 0.094       | 0.667       | 0.902       | 0.967      | 0.870      | 0.905       | —          |         |           |           |        |         |            |         |           |            |          |       |       |
| TMT B-A     | Spearman's rho | -0.297      | -0.330      | -0.218      | -0.344     | -0.366     | 0.183       | -0.207     | —       |           |           |        |         |            |         |           |            |          |       |       |
|             | p-value        | 0.159       | 0.116       | 0.306       | 0.099      | 0.079      | 0.391       | 0.332      | —       |           |           |        |         |            |         |           |            |          |       |       |
| FMPS_PE     | Spearman's rho | 0.358       | 0.144       | 0.010       | -0.030     | -0.246     | 0.186       | 0.030      | -0.191  | —         |           |        |         |            |         |           |            |          |       |       |
|             | p-value        | 0.079       | 0.491       | 0.964       | 0.888      | 0.236      | 0.373       | 0.888      | 0.382   | —         |           |        |         |            |         |           |            |          |       |       |
| FMPS_DA     | Spearman's rho | 0.437 *     | 0.016       | 0.130       | 0.100      | 0.135      | -0.051      | -0.029     | 0.061   | 0.562 **  | —         |        |         |            |         |           |            |          |       |       |
|             | p-value        | 0.029       | 0.941       | 0.537       | 0.635      | 0.521      | 0.808       | 0.889      | 0.784   | 0.003     | —         |        |         |            |         |           |            |          |       |       |
| FMPS_O      | Spearman's rho | 0.088       | 0.148       | 0.060       | 0.158      | 0.034      | -0.018      | -0.305     | 0.285   | -0.225    | 0.195     | —      |         |            |         |           |            |          |       |       |
|             | p-value        | 0.677       | 0.480       | 0.776       | 0.450      | 0.873      | 0.931       | 0.139      | 0.188   | 0.280     | 0.349     | —      |         |            |         |           |            |          |       |       |
| FMPS_SP     | Spearman's rho | 0.085       | -0.010      | -0.126      | 0.099      | -0.212     | -0.161      | 0.228      | -0.259  | 0.607 **  | 0.473 *   | -0.035 | —       |            |         |           |            |          |       |       |
|             | p-value        | 0.686       | 0.962       | 0.547       | 0.637      | 0.309      | 0.443       | 0.274      | 0.232   | 0.001     | 0.017     | 0.869  | —       |            |         |           |            |          |       |       |
| SPSRQ_P     | Spearman's rho | 0.300       | 0.142       | 0.059       | -0.082     | -0.126     | 0.287       | 0.026      | -0.057  | 0.535 **  | 0.596 **  | 0.177  | 0.353   | —          |         |           |            |          |       |       |
|             | p-value        | 0.121       | 0.473       | 0.767       | 0.678      | 0.524      | 0.139       | 0.894      | 0.791   | 0.006     | 0.002     | 0.397  | 0.083   | —          |         |           |            |          |       |       |
| SPSRQ_R     | Spearman's rho | 0.013       | 0.013       | 0.006       | 0.011      | -0.084     | -0.050      | 0.591 ***  | -0.108  | 0.268     | 0.229     | -0.119 | 0.327   | -0.014     | —       |           |            |          |       |       |
|             | p-value        | 0.946       | 0.947       | 0.977       | 0.956      | 0.670      | 0.799       | <.001      | 0.616   | 0.196     | 0.271     | 0.572  | 0.111   | 0.945      | —       |           |            |          |       |       |
| STAI_E      | Spearman's rho | 0.270       | 0.085       | 0.071       | 0.060      | -0.110     | 0.356       | 0.041      | 0.210   | 0.335     | 0.193     | -0.075 | 0.108   | 0.648 ***  | -0.136  | —         |            |          |       |       |
|             | p-value        | 0.165       | 0.667       | 0.720       | 0.762      | 0.579      | 0.063       | 0.835      | 0.326   | 0.101     | 0.355     | 0.722  | 0.608   | < .001     | 0.490   | —         |            |          |       |       |
| STAI_T      | Spearman's rho | 0.361       | -0.010      | 0.060       | -0.042     | -0.196     | 0.217       | 0.051      | -0.129  | 0.742 *** | 0.496 *   | -0.093 | 0.460 * | 0.765 ***  | 0.060   | 0.656 *** | —          |          |       |       |
|             | p-value        | 0.059       | 0.960       | 0.762       | 0.831      | 0.317      | 0.266       | 0.797      | 0.549   | < .001    | 0.012     | 0.659  | 0.021   | < .001     | 0.761   | < .001    | —          |          |       |       |
| SSEI        | Spearman's rho | -0.287      | -0.023      | -0.003      | -0.003     | 0.032      | -0.170      | -0.131     | -0.023  | -0.364    | -0.637 ** | -0.215 | -0.170  | -0.835 *** | 0.010   | -0.561 ** | -0.684 *** | —        |       |       |
|             | p-value        | 0.164       | 0.913       | 0.988       | 0.987      | 0.880      | 0.417       | 0.533      | 0.918   | 0.087     | 0.001     | 0.325  | 0.438   | < .001     | 0.961   | 0.004     | < .001     | —        |       |       |
| HAD_D       | Spearman's rho | 0.182       | 0.047       | -0.126      | 0.098      | -0.233     | -0.050      | 0.065      | 0.139   | 0.468 *   | 0.334     | 0.064  | 0.326   | 0.412      | -0.020  | 0.359     | 0.487 *    | -0.302   | —     |       |
|             | p-value        | 0.407       | 0.832       | 0.565       | 0.658      | 0.286      | 0.820       | 0.767      | 0.547   | 0.032     | 0.140     | 0.782  | 0.149   | 0.051      | 0.927   | 0.093     | 0.019      | 0.173    | —     |       |
| HAD_A       | Spearman's rho | 0.448 *     | 0.479 *     | 0.532 **    | 0.136      | -0.102     | 0.201       | -0.355     | -0.132  | 0.567 **  | 0.368     | 0.124  | 0.188   | 0.589 **   | -0.102  | 0.460 *   | 0.685 ***  | -0.439 * | 0.304 | —     |
|             | p-value        | 0.032       | 0.021       | 0.009       | 0.537      | 0.645      | 0.359       | 0.097      | 0.569   | 0.007     | 0.101     | 0.593  | 0.415   | 0.003      | 0.642   | 0.027     | < .001     | 0.041    | 0.158 | —     |

\*Legend : \* p < .05, \*\* p < .01, \*\*\* p < .001;

front\_front : ΔFC between the orbital part of the left frontal inferior gyrus and the triangular part of the right frontal inferior gyrus ; cere\_cinguR/L : ΔFC between the right cerebellar region 3 and right/left anterior cingulate cortices ; cere\_tempo : ΔFC between the right cerebellar region 3 and the right superior pole of the temporal lobe; cere\_front : ΔFC between the right cerebellar region 3 and the orbital part of the right frontal inferior gyrus; cauda\_lingu : ΔFC between the right caudate and left lingual gyrus
